# Supplementary material for: Synthesis, crystal structure and MMCT of new cyanide-bridged complexes cis-MII(dppm)2(CN)2(FeIIIX3)2 (M = Ru, Os)
Source: Royal Society of Chemistry journal article supplement (doi:10.1039/c4ra13825b), 2014-12-02
Supplement: c4ra13825b1.pdf [file c4ra13825b1.pdf]

## Supporting Information

### Synthesis, Crystal Structure and MMCT of New Cyanide-bridged Complexes *cis*-M<sup>II</sup>(dppm)<sub>2</sub>(CN)<sub>2</sub>(Fe<sup>III</sup>X<sub>3</sub>)<sub>2</sub> (M = Ru, Os)

Yong Wang,<sup>a, b</sup> Jinshuai Song,<sup>a</sup> Xiao Ma,<sup>a</sup> Zhenzhen Xue,<sup>a, b</sup> Shengmin Hu,<sup>a</sup> Ruibiao Fu,<sup>a</sup> Chunsen Li,<sup>\*a</sup> Tianlu Sheng<sup>\* a</sup> and Xintao Wu<sup>a</sup>

<sup>a</sup>State Key Laboratory of Structure Chemistry, Fujian Institute of Research on the Structure of Matter, Chinese Academy of Sciences, Fuzhou, 350002, China. E-mail: chunsen.li@fjirsm.ac.cn, tsheng@fjirsm.ac.cn.

<sup>b</sup>School of Chemistry and Chemical Engineering, University of Chinese Academy of Sciences, Beijing, 100049, China.

**Table S1.** Calculated Geometries of Compounds 1-6.

|            | 1     | 2     | 3     | 4     | 5     | 6     |
|------------|-------|-------|-------|-------|-------|-------|
| M1-C51     | 2.025 | 2.016 | 1.989 | 1.992 | 1.983 | 1.989 |
| M1-C52     | 2.024 | 2.003 | 1.991 | 1.993 | 1.988 | 1.988 |
| M1-P1      | 2.388 | 2.369 | 2.420 | 2.419 | 2.429 | 2.416 |
| M1-P2      | 2.387 | 2.365 | 2.501 | 2.500 | 2.492 | 2.482 |
| M1-P3      | 2.483 | 2.405 | 2.421 | 2.418 | 2.417 | 2.419 |
| M1-P4      | 2.486 | 2.397 | 2.502 | 2.499 | 2.487 | 2.478 |
| C51≡N1     | 1.173 | 1.130 | 1.174 | 1.174 | 1.177 | 1.176 |
| C52≡N2     | 1.173 | 1.145 | 1.174 | 1.174 | 1.177 | 1.176 |
| C51-M1-C52 | 86.2  | 87.4  | 88.2  | 87.8  | 87.4  | 88.1  |
| N1≡C51-M1  | 175.1 | 175.3 | 175.2 | 175.3 | 175.0 | 175.8 |
| N2≡C52-M1  | 175.2 | 177.5 | 175.1 | 175.2 | 175.8 | 175.1 |
| C51≡N1-Fe1 |       |       | 174.8 | 176.4 | 179.2 | 176.1 |
| C52≡N2-Fe2 |       |       | 175.2 | 176.5 | 172.1 | 178.5 |
| Fe1-N1     |       |       | 1.995 | 2.003 | 1.987 | 1.996 |
| Fe2-N2     |       |       | 1.996 | 2.003 | 1.986 | 1.996 |
| Fe1-X1     |       |       | 2.223 | 2.367 | 2.240 | 2.370 |
| Fe1-X2     |       |       | 2.236 | 2.354 | 2.226 | 2.356 |
| Fe1-X3     |       |       | 2.215 | 2.345 | 2.214 | 2.347 |
| Fe2-X4     |       |       | 2.236 | 2.367 | 2.215 | 2.357 |
| Fe2-X5     |       |       | 2.215 | 2.345 | 2.209 | 2.347 |
| Fe2-X6     |       |       | 2.223 | 2.354 | 2.259 | 2.369 |
